1 **Sex makes them sleepy: change in host reproductive status induces diapause in a**  
2 **parasitoid population experiencing harsh winters**

---

3

4

5

6 **Tougeron K.<sup>1,2</sup>, Brodeur J.<sup>2</sup>, van Baaren J.<sup>1</sup>, Renault D.<sup>1,3</sup> & Le Lann C.<sup>1</sup>**

7 <sup>1</sup> Univ Rennes, CNRS, ECOBIO (Ecosystèmes, biodiversité, évolution) - UMR 6553, 263 Avenue du  
8 Général Leclerc, F-35000 Rennes, France.

9 <sup>2</sup> Institut de Recherche en Biologie Végétale, Département de Sciences Biologiques, Université de  
10 Montréal, 4101 rue Sherbrooke Est, Montréal, QC, Canada, H1X 2B2.

11 <sup>3</sup> Institut Universitaire de France, 1 rue Descartes, 75231 Paris Cedex 05, France

12

13

14 **Corresponding author:** [tougeron.kevin@gmail.com](mailto:tougeron.kevin@gmail.com)

15 Current address: The University of Wisconsin – La Crosse, Department of Biology, La Crosse,  
16 Wisconsin, United States of America, 1725 State street, 54601

17

18

19

20

## 21 Abstract

22 When organisms coevolve, any change in one species can induce phenotypic changes in  
23 traits and ecology of the other species. The role such interactions play in ecosystems is central,  
24 but their mechanistic bases remain underexplored. Upper trophic level species have to  
25 synchronize their life-cycle to both abiotic conditions and to lower trophic level species'  
26 phenology and phenotypic variations. We tested the effect of host seasonal strategy on  
27 parasitoid diapause induction by using a holocyclic clone of the pea aphid *Acyrtosiphon pisum*  
28 producing asexual and sexual morphs that are viviparous females (i.e. laying embryos) and  
29 oviparous females (laying eggs), respectively, the latter being only present at the end of the  
30 growing season. *Aphidius ervi* parasitoids from populations of contrasted climatic origin (harsh  
31 vs. mild winter areas) were allowed to parasitize each morph in a split-brood design and  
32 developing parasitoids were next reared under either fall-like or summer-like temperature-  
33 photoperiod conditions. We next examined aspects of the host physiological state by comparing  
34 the relative proportion of forty-seven metabolites and lipid reserves in both morphs produced  
35 under the same conditions. We found that oviparous morphs are cues *per se* for diapause  
36 induction; parasitoids entered diapause at higher levels when developing in oviparous hosts  
37 ( $19.4 \pm 3.0\%$ ) than in viviparous ones ( $3.6 \pm 1.3\%$ ), under summer-like conditions (i.e., when  
38 oviparous aphids appear in the fields). This pattern was only observed in parasitoids from the  
39 harsh winter area since low diapause levels were observed in the other population, suggesting  
40 local adaptations to overwintering cues. Metabolomics analyses show parasitoids' response to  
41 be mainly influenced by the host's physiology, with higher proportion of polyols and sugars,  
42 and more fat reserves being found in oviparous morphs. Host quality thus varies across the  
43 seasons and represents one of the multiple environmental parameters affecting parasitoid  
44 diapause. Our results underline strong coevolutionary processes between hosts and parasitoids  
45 in their area of origin, likely leading to phenological synchronization, and we point out the  
46 importance of such bottom-up effects for trait-expression, and for the provision of ecosystem  
47 service such as biological control in the context of climate change.

48

## 49 Key-words

50 Coevolution; Phenotypic plasticity; Phenology; Host-parasite synchronization;  
51 Environmental cue; Metabolomics

52

53

54

55

56

## 57 Introduction

58 Interacting individuals from two biological entities can adjust their phenotypes in response to  
59 cues from each other, even when these cues vary across time (Agrawal 2001). Beneficial or  
60 antagonistic interactions, from mutualism to parasitism, predation and competition may lead to  
61 adaptive phenotypic responses. When interactions persist over generations, coevolution can  
62 occur and species adapt to the interacting species' life history traits, phenology and ecology  
63 (Agrawal 2001, Ellers et al. 2012). Interaction norms (Thompson 1988) arise from ecological  
64 responses of interacting organisms in varying environments, as any phenotypic change  
65 occurring in one "partner" species can cascade to the other species' phenotype (Fordyce 2006,  
66 Hughes 2012). Cues produced by one interacting species may indirectly inform the other species  
67 of environmental changes. For example, plant senescence in fall can inform herbivorous insects  
68 of upcoming detrimental winter conditions and induces phenotypic changes (e.g. diapause  
69 induction) or migration behaviour (Archetti et al. 2009).

70 Parasitoids are excellent models to study phenotypic expression in interacting species  
71 because they are strongly influenced during immature stages by changes in nutritional and  
72 physiological quality of their host (Godfray 1994). Diapause is an important ecological process  
73 in insects allowing them to survive recurrent unfavorable environmental conditions (Tauber et  
74 al. 1986). For parasitoids, diapause also contributes to maintain synchronization with their  
75 host's seasonal reproductive-cycle; it is induced before suitable hosts vanish from the  
76 environment (Lalonde 2004). As in most insects, diapause in parasitoids is mainly induced by  
77 abiotic cues perceived either by the generation that will enter diapause, or by the maternal  
78 generation (Tauber et al. 1986). A few studies also reported that diapause in parasitoids can be  
79 triggered by the onset of host diapause (Polgár and Hardie 2000, Gerling et al. 2009), or through  
80 intraspecific competition for hosts (Tougeron et al. 2017a). However, whether the phenotype of  
81 a non-diapausing host can influence parasitoid diapause remains poorly studied.

82 Aphids are hosts for Aphidiinae parasitoids and can have very complex cycles showing  
83 seasonal alternation between morphs with asexual and sexual reproduction (Dixon 1985).  
84 Asexual females reproduce parthenogenetically and lay live offspring (i.e. viviparity) whereas  
85 sexually reproducing females produce eggs (i.e. oviparity) after mating with males. Sexual  
86 aphid morphs are present at higher proportions in harsh than in mild winter climates (Dedryver  
87 et al. 2001), and they represent the last hosts available for aphid parasitoids before winter as  
88 they produce overwintering eggs in fall (Leather 1992). Consequently, sexual morphs have been  
89 suggested to promote diapause in parasitoids, indicating a host physiological effect (Polgár et al.  
90 1991, 1995, Christiansen-Weniger and Hardie 1997). No mechanistic understanding of this  
91 phenomenon has been proposed and the effects of the host morph have not been detangled from  
92 confounding factors such as host genotype and geographic origin, host size, abiotic conditions,  
93 or the season at which hosts are sampled in the fields. Hosts and parasitoids have coevolved  
94 over long periods of time, they respond to similar seasonal cues and the physiological syndrome  
95 associated with overwintering is highly conserved among insects (Tauber et al. 1986, Denlinger  
96 2002). As a result, the related physiological state of the host may represent a reliable signal of  
97 upcoming seasonal changes for parasitoids.

98 Hormones, fats, carbohydrates and other types of metabolites are involved in the control of  
99 overwintering and diapause expression in insects (Chippendale 1977, Christiansen-Weniger and  
100 Hardie 1999, Denlinger 2002, Sinclair and Marshall 2018). In aphid parasitoids, metabolomic  
101 and proteomic profiles differ between diapausing and non-diapausing individuals, with higher

102 amounts of sugars, polyols and heat shock proteins being found in diapausing parasitoids  
103 (Colinet et al. 2012). In aphids, morphs differ in morphology and physiology; oviparous females  
104 accumulate reserves to produce energetically costly diapausing eggs (Le Trionnaire et al. 2008)  
105 with cryoprotectant compounds such as mannitol and glycerol (Sömme 1969), whereas  
106 viviparous females metabolize energetic resources rapidly to produce embryos. Aphids'  
107 triglyceride reserves change quantitatively and qualitatively across the seasons with alternating  
108 morphs (Greenway et al. 1974). Immature parasitoids are known to consume sugars and lipids  
109 from their hosts (Jervis et al. 2008) and are therefore influenced by host reserves for their  
110 growth and development.

111 We questioned the extent to which oviparous and viviparous morphs of a single clone of the  
112 pea aphid *Acyrtosiphon pisum* (Harris) (Hemiptera: Aphididae) influences winter diapause  
113 expression in the parasitoid *Aphidius ervi* Haliday (Hymenoptera: Braconidae) under summer  
114 and fall conditions. Under laboratory conditions, we compared the response to two aphid  
115 morphs of two populations of parasitoids from mild (France) and harsh (Canada) winter areas  
116 that differed in their level of diapause expression (Tougeron et al. 2018). In *Aphidius* species,  
117 winter diapause is initiated at the prepupal stage within the aphid mummy (i.e. dead aphid  
118 containing a developing parasitoid) following stimuli perceived by the mother or early  
119 developmental stages (Brodeur and McNeil 1989, Tougeron et al. 2017b). We hypothesized that  
120 parasitoids of both populations developing in oviparous hosts enter diapause at higher  
121 proportions than those developing in viviparous hosts, independently of photoperiod and  
122 temperature. We predicted this pattern to originate from differences in aphids' physiological  
123 contents. We thus performed physiological analyzes to measure lipid content and quantify aphid  
124 morphs metabolites. We also hypothesized parasitoids from mild winter area to be less  
125 responsive to diapause inducing cues from the host and the environment, because parasitoid  
126 populations should be adapted to climatic conditions and relative occurrence of sexual hosts in  
127 their respective area of origin.

128

## 129 **Material and Methods**

### 130 *Biological materials*

131 Two populations of the parasitoid *A. ervi* were collected in 2015 at the mummy stage in pea  
132 fields from two contrasted climatic origins: near Montréal, QC, Canada (45.584°N, 73.243°W;  
133 harsh winter area) and near Rennes, France (48.113°N, 1.674°W; mild winter area). We did not  
134 expect that using multiple populations from both geographic origins would have significantly  
135 affected our results since *A. ervi* show high gene flow (Hufbauer et al. 2004). Even if gene flow  
136 was weak, we would expect higher differences among Canadian and French populations than  
137 among populations of a same location. Parasitoids were then reared under controlled conditions  
138 using a cyclically parthenogenetic clone (clone F2-X9-47) of the pea aphid *A. pisum* provided  
139 by INRA Le Rheu, France, and known to produce both oviparous and viviparous aphid morphs  
140 (Jaquiéry et al. 2014). The aphid clone we used was not symbiotyped, but the grandparent  
141 generation was. Half of the grand-parent was associated with *Serratia symbiotica*, the other half  
142 had no secondary endosymbiont (J. Jaquiéry pers. comm.), so it is likely that our clone was  
143 inhabited by *S. symbiotica*. All insects were maintained on fava bean *Vicia faba* (Fabaceae) at  
144 20 °C, 70% relative humidity (RH) and 16:8 h Light:Dark (L:D) photoregime.

145

146 *Production of sexual and asexual hosts*

147 Three aphid morphs were used in the experiments; oviparous females (O), viviparous  
148 females (V) and a control treatment for viviparous females (C), as detailed below.

149 Three parthenogenetic *A. pisum* adult females from the aphid culture were put on bean plants  
150 (N=15) and allowed to lay larvae during four days at 20 °C, 70% RH, 16:8 h LD. Females were  
151 then removed and infested plants were put in a growing chamber at 17 °C, 70% RH, 12:12 h  
152 (L:D), and under 36W, IRC 85, 6500 K day-light type fluorescent tubes to induce the  
153 production of sexual aphids (Le Trionnaire et al. 2009). At each generation, plants were  
154 renewed, and less than five aphids were maintained per plant to prevent formation of winged  
155 individuals due to overcrowding (Hardie 1980). As embryos directly detect photoperiodic cue  
156 through the cuticle of the grand-mother (Le Trionnaire et al. 2008), the first sexual aphids:  
157 males (~20%) and oviparous females (30 to 60%) were formed, along with asexual aphids (20  
158 to 50%): sexuparous (a particular type of parthenogenetic females producing sexual morphs)  
159 and viviparous aphids (parthenogenetic females producing only parthenogenetic morphs), after  
160 three generations under these conditions. As sexuparous and viviparous aphids cannot be  
161 distinguished morphologically, they were indistinctly considered as the “viviparous female”  
162 treatment. However, a control group of viviparous parthenogenetic females (C) was produced  
163 by rearing aphids under non-sexual-inductive conditions (20 °C, 70% RH, 16:8 h L:D). This  
164 treatment controls for potential stress effects of the sexual-inductive conditions on the aphid,  
165 and allows to solely measuring the response of viviparous aphids as sexuparous are not  
166 produced under this condition (Dixon 1985). Oviparous aphid morphs were differentiated from  
167 viviparous ones under a stereo microscope (x10) by observing the morphology of their legs:  
168 oviparous female aphids have rhinaria on the tibia, and have a femur of the same width as the  
169 tibia, and viviparous females have a wider tibia than the femur without rhinaria (Lamb and  
170 Pointing 1972, Hullé et al. 2006). Aphid males were not included in our analyses since *A. ervi*  
171 does not parasitize them, probably because they are too small and have lower energetic reserves  
172 than female morphs (Tougeron et al., unpublished data).

173

174 *Diapause induction*

175 Aphid mummies from the colonies were isolated in a small gelatin capsule until parasitoid  
176 emergence. Newly emerged parasitoids were put in a 5 cm plastic tube for mating (5 females  
177 with 2 males) for 24 h, and were fed with a 70% diluted honey solution. Maternal genotype,  
178 egg-laying order in different aphid morphs, in addition to parasitoids' age or host preference  
179 may affect diapause induction (Brodeur and McNeil 1989). To consider these potential effects,  
180 twelve *A. ervi* females were individually allowed to parasitize 16 adult aphids of the same age  
181 and size within the same cohort and of each of the three morph types (oviparous female,  
182 viviparous female, control viviparous females produced under non-sexual-inductive conditions,  
183 N=48 aphids offered for parasitism per female wasp) for 12 h over three consecutive days, by  
184 alternating the order of presentation of aphid morphs among females. Parasitoids rested at night,  
185 with an access to diluted honey. Aphids were introduced in a plastic tube (10 x 3 cm) and were  
186 given a few minutes to settle on a bean cut plant, after which a parasitoid was introduced into  
187 the tube. Four parasitoid females were first individually put in presence of oviparous aphids,  
188 then moved to a second tube with control viviparous aphids and next moved to a third tube

189 containing viviparous aphids (OCV). Four other females were first offered viviparous aphids  
190 (VOC), and the last four females were first offered control viviparous aphids (CVO) (Fig. 1).

191 After each oviposition period, the 16 potentially parasitized aphids of each morph type were  
192 transferred by group of 8 on two bean plants. Plants were next enclosed into micro-perforated  
193 plastic bags and placed at either 20 °C, 16:8 h (L:D) (summer-like conditions not inducing  
194 diapause in *A. ervi*) or 17 °C, 10:14 h (L:D) (autumn-like conditions inducing diapause)  
195 (Tougeron et al. 2017b). When the plants began to wilt, aphids were transferred to another plant  
196 with a small paintbrush. Mummification was checked daily and newly-formed mummies were  
197 placed individually into gelatin capsules, and remained under their respective temperature and  
198 photoperiod treatments until adult emergence. Mummies from which no parasitoid had emerged  
199 15 days after mummification were dissected, and the content was recorded as dead parasitoids  
200 or diapausing individuals (golden-yellow prepupae, Tougeron et al. 2017b). This experiment  
201 was repeated twice per parasitoid population; diapause levels were thus calculated among the  
202 offspring of 24 females for each treatment. Patterns were consistent in each of the repeated  
203 experiments. Our split-brood family design also allowed comparing reaction norms of diapause  
204 levels in the offspring of each parasitoid female, both within morphs at different abiotic  
205 conditions, and within abiotic conditions among morphs.

206 The aphid morph (individual differences within a population due to developmental plasticity)  
207 and the aphid clone (differences in reproduction modes genetically determined between  
208 populations) may both influence parasitoid diapause. To consider this aspect, we compared the  
209 incidence of diapause when parasitoids developed in the cyclically parthenogenetic clone  
210 (holocyclic, i.e., alternating between sexual and sexual morphs) described above and in an  
211 obligate parthenogenetic clone, producing only viviparous females (anholocyclic clone F2-X9-  
212 19; Jaquiéry et al. 2014). To achieve this goal, five *A. ervi* females were individually allowed to  
213 sequentially parasitize 35 viviparous aphids of each clone during 12 h. Parasitized hosts were  
214 next placed at 17 °C 10:14 h (L:D), and diapause induction was measured as described above.  
215 We excluded any clone effect because diapause incidence was similar for parasitoids developing  
216 in viviparous aphids of either the holocyclic ( $59.9 \pm 10.1\%$ ,  $n=132$  mummies) or the  
217 anholocyclic ( $66.0 \pm 7.7\%$ ,  $n=112$  mummies) clone (GLM,  $p=0.97$ ). The cyclically  
218 parthenogenetic clone was thus used for the experiments.

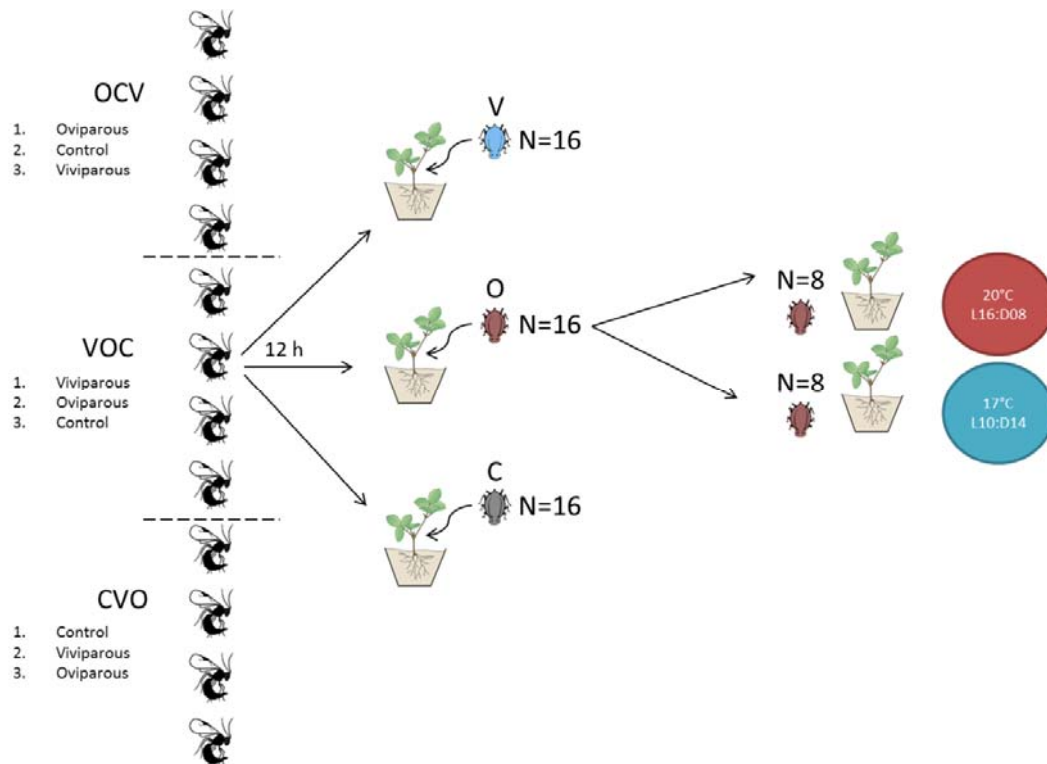

219

220 Figure 1: Experimental design for diapause induction in the parasitoid *Aphidius ervi*. Twelve parasitoid  
 221 females were individually allowed to parasitize 16 *Acyrtosiphon pisum* from each of the three host  
 222 morphs for 12 h: oviparous (O), viviparous (V) and viviparous control (C). First contact (parasitism  
 223 sequence) with an aphid was alternated between the three morphs (OCV, VOC, CVO). Following  
 224 parasitism, the aphid cohort was split in two and individuals were reared under a diapause-inductive  
 225 condition (17 °C 10:14 h L:D) or a non-diapause-inductive condition (20 °C 16:8 h L:D). This protocol  
 226 was repeated twice for parasitoid populations originating from mild or harsh winter.

### 227 *Metabolomic analyses and lipid reserves*

228 Non-parasitized apterous adult aphids of viviparous and oviparous females of the same age  
 229 (between 24 and 48 h after imago molt), produced under the same conditions used for the  
 230 diapause experiment (at 17 °C, 12:12 h (L:D)), were kept at -20 °C for metabolomic and lipid  
 231 analyses. Samples were dried out for 2 days in a freeze-dryer and their dry mass measured using  
 232 a Mettler-Toledo precision scale (accurate to 0.001 mg). Viviparous aphids' dry mass ranged  
 233 from 0.280 mg to 0.742 mg, and oviparous aphids' dry mass ranged from 0.358 mg to 0.739  
 234 mg.

235 For metabolic analyses, 18 aphids of each morph (viviparous and oviparous females) were  
 236 used. Nine replicates were analyzed for each morph condition, each consisting of a pool of two  
 237 aphid females. The samples were put in 600 µL of chloroform-methanol (1:2) solution and  
 238 homogenized using a tungsten-bead beating apparatus at 30 Hz for 1.5 min. Then, 400 µL of  
 239 ultrapure water was added to each tube and samples were centrifuged at 4 °C, 4,000 g for 5 min.  
 240 Finally, 90 µL of the upper aqueous phase containing metabolites were transferred to  
 241 chromatographic vials. Injection order of the samples was randomized prior mass spectrometry  
 242 detection. Metabolomic fingerprinting process was performed following the protocol of  
 243 Khodayari et al. (2013). Chromatograms were analyzed using XCalibur software (Thermo  
 244 Fischer Scientific, Waltham, MA, USA). We accurately quantified 47 metabolites: 14 amino

245 acids, 11 sugars / sugar phosphates, 8 organic acids, 7 polyols, 4 other metabolites and 3 amines  
246 (Table 1). Details of metabolite amounts measured from each morph are provided in Figure S1.

247 Lipid contents were measured using 52 oviparous females and 23 viviparous females. Each  
248 dry aphid was left for two weeks in a microtube containing 1 mL of chloroform-methanol  
249 solution (2:1) to extract lipids (Terblanche et al. 2004). Aphids were then rinsed with the same  
250 solution, and placed back in the freeze-dryer for 24 h to eliminate the residues of the extracting  
251 solution and next weighted again to measure fat content (= fat mass (mg) / lean dry mass (mg),  
252 Colinet et al. 2007).

253 Table 1: Metabolites detected in two morphs (viviparous and oviparous females)  
254 of the pea aphid, *Acyrtosiphon pisum*. Each metabolite has been found in each  
255 morph. Abbreviations used on Figure 3 are in brackets.

| <b>Amino acids</b>     | <b>Organic acids</b>               |
|------------------------|------------------------------------|
| Alanine (Ala)          | Citric acid (Cit_Ac)               |
| Aspartic acid (Asp_Ac) | Galacturonic acid (Gal_Ac)         |
| Citrulline (Citr)      | Glyceric acid (Glyc_Ac)            |
| Glutamic acid (Glu)    | Lactic acid (Lact_Ac)              |
| Glycine (Gly)          | Malic acid (Mal_Ac)                |
| Isoleucine (Ile)       | Phosphoric acid (Phos_Ac)          |
| Leucine (Leu)          | Pipecolic acid (Pipe_Ac)           |
| Lysine (Lys)           | Quinic acid (Quin_Ac)              |
| Ornithine (Orn)        | <b>Sugars and sugar phosphates</b> |
| Proline (Pro)          | Arabinose                          |
| Serine (Ser)           | Fructose                           |
| Valine (Val)           | Fructose-6-phosphate (F6P)         |
| Threonine (Thr)        | Galactose                          |
| Phenylalanine (Phe)    | Glucose                            |
| <b>Polyols</b>         | Glucose-6-phosphate (G6P)          |
| Adonitol               | Maltose                            |
| Arabitol               | Mannose                            |
| Galacticol             | Ribose                             |
| Glycerol               | Saccharose                         |
| Inositol               | Trehalose                          |
| Mannitol               | <b>Other metabolites</b>           |
| Xylitol                | Gluconolactone (GNL)               |
| <b>Amines</b>          | Gamma aminobutyric acid (GABA)     |
| Cadaverine (Cad)       | Glycerol-3-phosphate (Gly3P)       |
| Triethanolamine (TEA)  | Dopamine (Dop)                     |
| Putrescine (Put)       |                                    |

256

## 257 *Statistical analyses*

258 Generalized linear mixed-effects models (GLMM) with binomial distributions were fit to the  
259 data using the *lme4* package. The response variable was the proportion of diapausing  
260 parasitoids; the origin of the parasitoid population (Canada vs. France), the host morph (three  
261 modalities, O, V, C), the temperature/photoperiod conditions (17°C 10:14h vs 20°C 16:8h), and  
262 their interaction, were considered as fixed factors; the identity of each parasitoid female and the  
263 egg-laying (parasitism) order were considered as random effect factors in the models. As  
264 diapause incidence differed between parasitoid populations (GLMM,  $\chi^2=216$ ,  $df=1$ ,  $p<0.001$ ),  
265 data from both populations were analyzed separately using similar GLMMs. Significance of  
266 each term in the model was analyzed using the package *car*.

267 For metabolite data, concentrations of the compounds were first log-transformed. Then, a  
268 Principal Component Analysis (PCA) was performed to detect which metabolites (expressed in  
269 nmol.mg<sup>-1</sup>) differed the most between host morphs. Log-transformed metabolite concentrations



270 were then summed up among each category (Table 1) and another PCA was performed using  
271 metabolite groups as discriminatory factors. An ANOVA with FDR-adjusted p-values was next  
272 performed to compare concentrations of each metabolite between morphs. Finally, an ANOVA  
273 tested differences in fat content between oviparous and viviparous morphs. All statistical  
274 analyses were carried out using the R software (R Core Team 2017).

275

## 276 **Results**

### 277 *Diapause incidence in the parasitoid A. ervi*

278 In the Canadian (harsh winter area) population, diapause levels were affected by host morph  
279 (GLMM,  $\chi^2=12.6$ ,  $df=2$ ,  $p<0.001$ ; Fig. 2) and abiotic conditions (GLMM,  $\chi^2=250.0$ ,  $df=1$ ,  
280  $p<0.001$ ), with an interaction effect as host morphs influenced parasitoid diapause incidence  
281 only at 20 °C 16:8 h (L:D) (GLMM,  $\chi^2=16.9$ ,  $df=2$ ,  $p<0.001$ ). Diapause incidence was higher at  
282 17 °C 10:14 h LD than at 20 °C, 16:8 h LD, for the Canadian population ( $76.9 \pm 2.5\%$  vs.  $9.0 \pm$   
283  $1.5\%$ , respectively). At 20 °C, 16:8 h LD, diapause incidence was higher when Canadian  
284 parasitoids developed in oviparous aphids ( $19.4 \pm 3.0\%$  s.e.) than in viviparous aphids ( $3.6 \pm$   
285  $1.3\%$ ,  $z=-4.3$ ,  $p<0.001$ ) or viviparous control aphids ( $3.8 \pm 1.4\%$ ,  $z=-3.9$ ,  $p<0.001$ ).

286 In the French (mild winter area) population, the host morph did not influence parasitoid  
287 diapause (GLMM,  $\chi^2=1.84$ ,  $df=2$ ,  $p=0.39$ ), abiotic conditions did influence parasitoid diapause  
288 (GLMM,  $\chi^2=237.9$ ,  $df=1$ ,  $p<0.001$ ), but no interaction effect can be interpreted since no  
289 diapause was expressed for the French population at 20 °C, 16:8 h LD. Diapause incidence was  
290 higher at 17 °C 10:14 h LD than at 20 °C, 16:8 h LD, for the French population ( $27.9 \pm 2.1\%$  vs.  
291  $0\%$ , respectively). Random factors female identity and host exposition order had negligible  
292 effects on total variance explained in both our models for both populations (variance  $\leq 0.02$ ).

293 Some female parasitoids produced offspring that had stronger responses to changes in host  
294 morph or in abiotic conditions than offspring of other females. In some female's brood, there  
295 was no variation in diapause plasticity in response to different biotic (morphs) or abiotic  
296 (photoperiod and temperature) conditions (RN slope = 0). Data for each female is made  
297 available as a supplementary material sheet. In the Canadian population at 17°C 10:14 h LD,  
298 reaction norm (RN) slopes (i.e., diapause level variations between conditions within a single  
299 brood) ranged from -71% to 48%, for the diapause response to either oviparous or viviparous  
300 morphs. At 20°C 14:10 h LD RN slopes ranged from -50% to 12%. For parasitoids developing  
301 in viviparous morphs, RN slopes ranged from -100% to -3%, and for parasitoids developing in  
302 oviparous morphs, RN slopes ranged from -100% to -12%, for the diapause response to either  
303 abiotic conditions (17°C 10:14 h LD vs. 20°C 14:10 h LD). In the French population at 17°C  
304 10:14 h LD, RN slopes ranged from -29% to 38% for the diapause response to either oviparous  
305 or viviparous morphs. For parasitoids developing in viviparous morphs, RN slopes ranged from  
306 -80% to 0%, and for parasitoids developing in oviparous morphs, RN slopes ranged from -50%  
307 to 0% for the diapause response to either abiotic conditions.

308

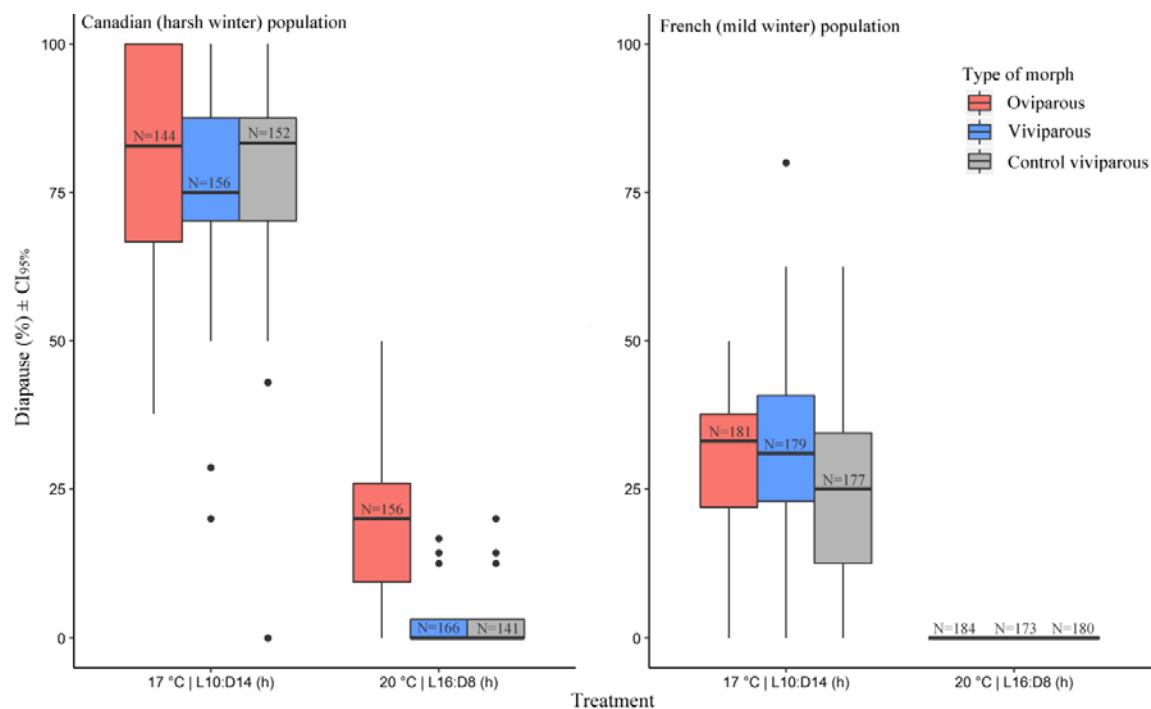

309

310 Figure 2: Percent diapause incidence ( $\pm$  CI<sub>95%</sub>) in two *Aphidius ervi* populations. *Left*: Canadian population  
 311 naturally experiencing harsh winter. *Right*: French population naturally experiencing mild winter. For both  
 312 populations, three different morphs of the pea aphid *Acyrthosiphon pisum* (oviparous sexual females, viviparous  
 313 parthenogenetic females produced under sexual-inductive conditions, and control viviparous females produced  
 314 under non- sexual-inductive conditions) were used for parasitoid development, under two abiotic conditions  
 315 (17 °C, 10:14 h LD or 20°C, 16:8 h LD). For each treatment, N represents the total number of parasitoid  
 316 mummies used to calculate diapause incidence.

317

### 318 *Metabolomic analyses and lipid reserves of aphid host morphs*

319 The first and second principal component (PC1 and PC2, respectively) of the PCA,  
 320 accounted for 37.1% and 26% of the total inertia, respectively (Fig. 3). Oviparous and  
 321 viviparous female hosts were separated on PC1, with oviparous females exhibiting significantly  
 322 higher concentrations of trehalose, ribose, arabitol, gamma aminobutyric acid and mannose than  
 323 viviparous ones (ANOVA, df=1, p<0.05) (Fig. S1). Conversely, viviparous hosts had  
 324 significantly higher concentrations of alanine, gluconolactone, dopamine, putrescine,  
 325 phenylalanine, glycerol, proline and quinic acid than oviparous aphids (ANOVA, df=1, p<0.05)  
 326 (Fig. S1). The second component of the PCA depicted the interindividual variation of  
 327 metabolites within each of the two morphs (Fig. 3).

328 The analysis by metabolic family revealed that sugars / sugar phosphates (at the exception of  
 329 glucose) and polyols were measured in higher amounts in oviparous morphs, while amino acids,  
 330 amines and other metabolites were generally found in higher concentrations in viviparous hosts  
 331 (Fig. S2). Altogether, metabolic differences among oviparous and viviparous females revealed  
 332 that activities of the pathways involved in aminoacyl-tRNA biosynthesis and glutathione  
 333 metabolism were higher in viviparous females.

334 Oviparous hosts had a higher fat content ratio (mg fat/mg dry mass) than viviparous ones  
 335 (0.63 ±0.02 and 0.51 ±0.03, n= 52 and n= 23, respectively) (ANOVA, LR=8.0, df=1, p<0.005).  
 336 The fat mass represented 37.8 ±0.8% and 33.3 ±1.3% of the dry mass of oviparous and  
 337 viviparous morphs, respectively.

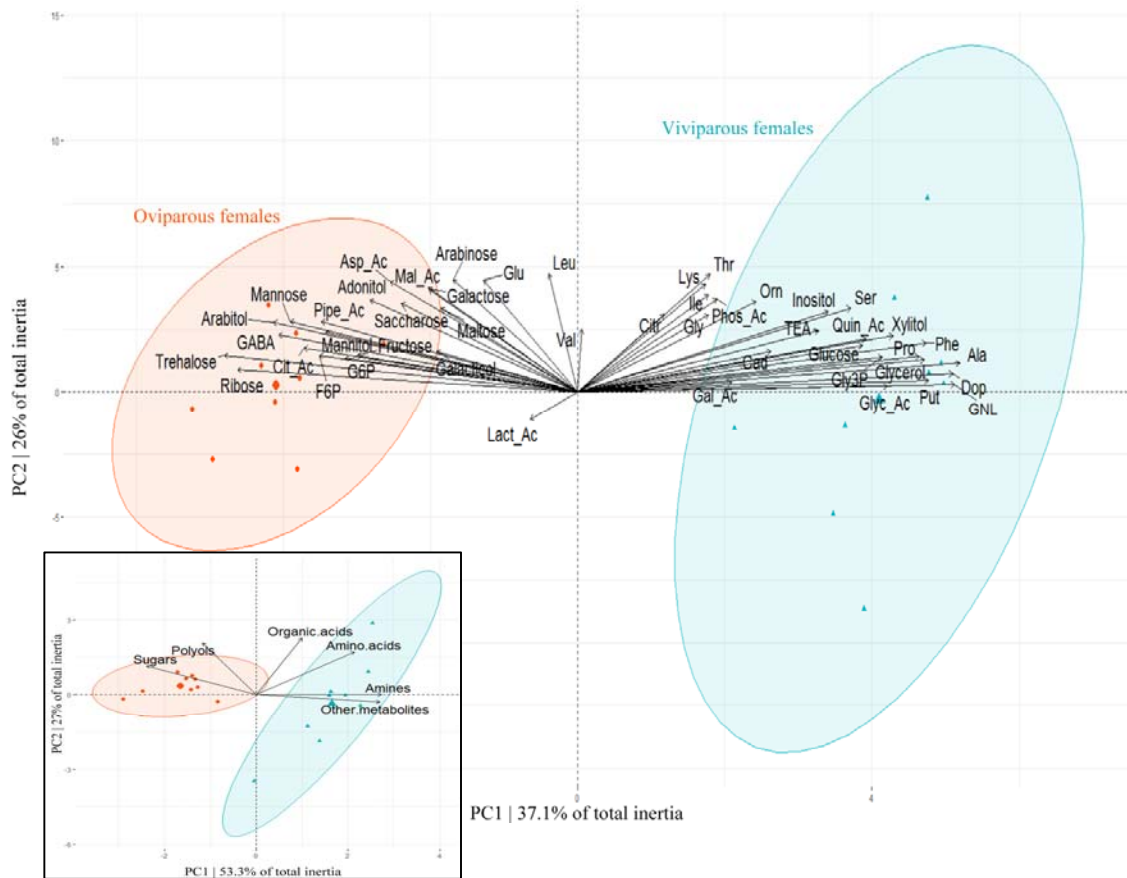

338

339

340 Figure 3: Multivariate analysis (PCA) on the first two principal components (PC) representing links between  
 341 metabolic compounds (47 log-transformed variables, nmol.mg<sup>-1</sup>) and two aphid morphs (oviparous vs.  
 342 viviparous females) of *Acyrthosiphon pisum*. Enclosed figure in the upper panel shows a PCA of the six  
 343 metabolite categories. Confidence ellipses (95%) are constructed around each aphid group centroid (n=9  
 344 replicates by morph). Contributions of metabolite variables to PC1 and PC2 are provided in supplementary  
 345 figure S3. Abbreviations are Alanine (Ala), Aspartic acid (Asp\_Ac), Cadaverine (Cad), Citric acid (Cit\_Ac),  
 346 Citrulline (Citr), Dopamine (Dop), Fructose-6-phosphate (F6P), Galacturonic acid (Gal\_Ac), Gamma  
 347 aminobutyric acid (GABA), Gluconolactone (GNL), Glucose-6-phosphate (G6P), Glutamic acid (Glu), Glyceric  
 348 acid (Glyc\_Ac), Glycerol-3-phosphate (Gly3P), Glycine (Gly), Isoleucine (Ile), Lactic acid (Lact\_Ac), Leucine  
 349 (Leu), Lysine (Lys), Malic acid (Mal\_Ac), Ornithine (Orn), Phenylalanine (Phe), Phosphoric acid (Phos\_Ac),  
 350 Pipecolic acid (Pipe\_Ac), Proline (Pro), Putrescine (Put), Quinic acid (Quin\_Ac), Serine (Ser), Threonine (Thr),  
 351 Triethanolamine (TEA), Valine (Val).

352

353

354

355

## 356 Discussion

357 Species interactions greatly contribute in shaping arthropods' seasonal ecological strategies,  
358 because one species needs to synchronize or unsynchronize its life-cycle with interacting  
359 partners or antagonists. However, biotic-induced diapause signals are poorly studied. A few  
360 cases of predator-induced diapause have been documented in arthropods (Ślusarczyk 1995,  
361 Kroon et al. 2008), such as in *Daphnia magna* (Diplostraca: Daphniidae) in which the  
362 production of diapausing eggs is stimulated by predator exudates and chemicals originating  
363 from injured conspecifics (Ślusarczyk 1999). Reversely, low prey density was reported to  
364 influence summer diapause of the lady beetle *Hippodamia undecimnotata* (Coleoptera:  
365 Coccinellidae) (Iperti and Hodek 1974). Also, in herbivorous insects that require strong  
366 synchrony with their host plant phenology, resuming activities after winter diapause is also  
367 influenced by the physiological status of the plant (Leather et al. 1993). Similarly, the host plays  
368 a major role in parasitoid seasonal ecology. In addition to abiotic factors, such as photoperiod  
369 and temperature, the host genotype, species, size, life-stage and abundance can modulate  
370 parasitoid diapause (Tauber et al. 1986, Danks 1987). We report that parasitoids can use host  
371 oviparous morph as a cue for diapause induction, with higher diapause incidence (up to 20%)  
372 expressed in *A. ervi* developing in oviparous *A. pisum* females compared to viviparous  
373 conspecifics. This pattern is likely due to differences in host physiology and metabolic contents.  
374 Of significance, only parasitoids from the harsh winter area and exposed to summer-like  
375 conditions relied on host morph as a cue for diapause induction.

376 Parasitoid populations of *A. ervi* from contrasted climatic environments (Canada and France)  
377 do not respond the same way to abiotic (photoperiod and temperature) and host cues. The  
378 French population of *Aphidius* spp. evolved under warming temperature conditions over the past  
379 decades, and this has allowed individuals of this species to remain active under mild winter  
380 conditions prevailing in this area, with none or small proportions of individuals entering  
381 diapause (Tougeron et al. 2017b). In mild winter areas, non-diapausing parasitoids maintain  
382 their populations by exploiting asexual anholocyclic aphid hosts during winter periods (Langer  
383 and Hance 2000, Andrade et al. 2015, 2016) as sexual morphs are rare in these areas (Dedryver  
384 et al. 2001). Diapause expression can be genetically lost or reduced in insects when they do not  
385 experience the necessary environmental factors for its induction (e.g., Bradshaw and Holzapfel  
386 2001, Garipey et al. 2015). Consequently, parasitoid populations from mild winter areas may  
387 not have evolved a response to sexual hosts, or they may have lost the capacity to answer such a  
388 cue to enter diapause under changing environments.

389 The opposite pattern is observed in Canadian populations, where all aphid parasitoids enter  
390 diapause during winter (Brodeur and McNeil 1994). In these cold temperate regions, sexual  
391 morphs of aphids are produced at the end of the growing season, and represent the last hosts  
392 available for parasitoids before the onset of unfavorable winter conditions. In addition,  
393 parasitism of aphid sexual morphs on primary host plants allows parasitoids to overwinter  
394 nearby their hosts, thereby favoring host availability in spring for newly emerged parasitoids,  
395 and improving reproductive-cycles synchronization (Höller 1990, Christiansen-Weniger and  
396 Hardie 1997). In regions with harsh winter climates, parasitoids have coevolved with the  
397 seasonal occurrence of host morphs and may use oviparous morphs as a convergent signal with  
398 temperature and photoperiod decrease in fall to enter diapause. Canadian Aphidiinae parasitoids  
399 begin to overwinter as early as mid-July, with all individuals being in diapause by early  
400 September (Brodeur and McNeil 1994, Tougeron et al. 2018). This seasonal pattern might be an  
401 adaptation to avoid early lethal frosts. Moreover, we showed that oviparous hosts only

402 influenced diapause under summer-like conditions, suggesting that encountering this morph  
403 informs the parasitoids for upcoming deleterious conditions and modulates diapause expression.  
404 In natural settings, alternative host species can be present, and both anholocyclic and holocyclic  
405 aphid populations can coexist (Dedryver et al. 2001), which may send confounding signals to  
406 parasitoids, and may explain why only a fraction of the population responded to oviparous  
407 morphs. In Canada, oviparous morphs of the pea aphid are present in the environment as soon as  
408 August (Lamb and Pointing 1972). In fall-like conditions, the morph effect was overridden by  
409 the temperature/photoperiod effect, which remains the main signal for diapause induction.  
410 Alternative diapause-inducing cues such as those associated with the host are usually viewed as  
411 factors modulating diapause expression which is mainly triggered by temperature and  
412 photoperiod (Tauber et al. 1986). For example, in the polyphagous herbivore *Choristoneura*  
413 *rosaceana* (Lepidoptera: Tortricidae), diapause is dependent upon photoperiod and  
414 temperature, but under similar abiotic conditions, the proportion of larvae entering diapause  
415 differs depending on the host-plant species (Hunter and McNeil 1997). Moreover, the effect of  
416 the host-plant was observed even under photoperiod and temperature conditions known to  
417 induce low levels of diapause (Hunter and McNeil 1997). The relative importance of each  
418 environmental cue at inducing diapause in insects remains to be evaluated for a significant  
419 number of species.

420 Parasitoids' response to host morph could be partly shaped by maternal effects, as females  
421 have the capacity to assess host quality through morphological or chemical cues (van Baaren  
422 and Nénon 1996, Boivin et al. 2012). Developing immature parasitoids may also directly  
423 respond to the quality and quantity of metabolites available from hosts, which could trigger the  
424 onset of diapause. The overwintering metabolic and physiological syndrome is highly conserved  
425 among insects (Tauber et al. 1986), and both hosts and parasitoids may respond to the same  
426 molecules involved in diapause initiation. As an example concurring to this hypothesis,  
427 diapausing prepupae of the aphid parasitoid *Praon volucre* (Hymenoptera: Braconidae) showed  
428 similar proportions of some sugars (e.g. trehalose, fructose) and polyols (e.g. arabitol) (Colinet  
429 et al. 2012) than non-parasitized oviparous morphs of the pea aphid tested in our study. Our  
430 results suggest that high concentrations of some polyols and sugar metabolites in the oviparous  
431 morphs, as well as accumulation of fat reserves associated with the overwintering process, may  
432 either directly contribute to induce diapause in parasitoids developing in such hosts or may  
433 trigger the internal physiological cascade responsible for parasitoid diapause.

434 In the present work, oviparous *A. pisum* females have higher fat reserves than their  
435 viviparous counterparts. This finding is consistent with the metabolic phenotypes of the hosts,  
436 which revealed higher levels of sugar and sugar phosphate metabolites from the glycolytic  
437 pathway in oviparous females, this pathway providing elementary bricks for fatty acid and  
438 triacylglyceride (TAG) synthesis. Fatty acids serve as a main source of energy for physiological  
439 or ecological processes, including flight, gametes production, egg maturation and hormones  
440 synthesis (Arrese and Soulages 2010), and have been shown to represent up to 30% of aphids'  
441 fresh mass (Dillwith et al. 1993, Sayah 2008). Interestingly, lipids can provide energy for  
442 overwintering insects and sugars can be metabolized to produce sugar-based cryoprotectant  
443 molecules (Storey and Storey 1991, Hahn and Denlinger 2011, Sinclair and Marshall 2018). In  
444 oviparous females, the need for TAG may be higher than in viviparous ones, as eggs with yolk  
445 (vitellus) are mostly composed of fat and proteins (Brough and Dixon 1990). Also, reserves  
446 from the fat-body, including TAG and glycogen, play major roles in overwintering insects,  
447 including diapause (reviewed in Sinclair and Marshall 2018) and could explain why oviparous

448 aphids have high fat content to prepare their eggs for successful overwintering. Diapause entails  
449 important energetic costs for insects (Ellers and Van Alphen 2002, Hahn and Denlinger 2011)  
450 and they may enter diapause only when a critical body-mass or amount of energetic reserves has  
451 been reached (Colinet et al. 2010); for parasitoids, developing in an oviparous host could  
452 contribute to reach this level.

453 Metabolites acting as compatible solutes greatly contribute to insect cold hardiness and  
454 overwintering survival (Storey and Storey 1991, Bale 2002, Hodkova and Hodek 2004).  
455 Metabolic analyses identified sugars and polyols in higher amounts in oviparous females  
456 containing eggs intended to overwinter. Overwintering eggs of the aphid *Hyalopterus pruni*  
457 (Homoptera: Aphididae) are characterized by high values of mannitol and trehalose (Sömme  
458 1969), as also observed in our *A. pisum* oviparous morphs. Glucose-6-phosphate and fructose  
459 were found at high concentrations in oviparous morphs of *A. pisum* and are precursors of  
460 sorbitol (Storey and Storey 1991), a cryoprotective compound also observed in diapausing  
461 individuals of *P. volucre* parasitoids (Colinet et al. 2012). Fructose-6-phosphate is a precursor of  
462 mannitol, and both are cryoprotectant molecules (Storey and Storey 1991) highly concentrated  
463 in oviparous female hosts, and found in most of overwintering insects (Leather et al. 1993).  
464 These metabolites may be responsible for diapause induction in parasitoids developing in  
465 oviparous morphs. Gamma aminobutyric acid was more concentrated in oviparous females and  
466 could also serve as an indirect seasonal cue for parasitoids because this neurotransmitter is  
467 known to be involved in insect perception of photoperiodic changes (Vieira et al. 2005).

468 Surprisingly, in viviparous females, we found high concentrations of glycerol a  
469 cryoprotective compound usually associated with the diapause syndrome (Hayward et al. 2005).  
470 As suggested by the high concentrations of glucose observed in these females, glycogen  
471 production through gluconeogenesis pathway could be used as main source of energy by these  
472 viviparous morphs (Dixon 1985). In addition, observed physiological differences between host  
473 morphs are not necessarily linked to overwintering strategies. For example, viviparous aphids  
474 have high concentrations of proline, which is used as fuel for insect flight (Teulier et al. 2016).  
475 Viviparous aphids can rapidly produce winged individuals for dispersal in case of overcrowding  
476 or degradation of host plant quality (Hardie 1980).

477 To conclude, intra- and interspecific interactions are of primary importance for ecosystem  
478 functions, such as biological control, but still require deeper investigations in the context of  
479 diapause and seasonal strategies. Overwintering strategies are rapidly shifting in the context of  
480 climate change (Bradshaw and Holzapfel 2001, Bale and Hayward 2010) and may cause  
481 temporal mismatches between trophically interacting species (Tylianakis et al. 2008, Walther  
482 2010). Thus, potential bottom-up effects on diapause, such as reported in our study, should be  
483 given more attention and should be considered as a potential factor explaining the low levels of  
484 diapause expression in insects from mild winter areas, together with global warming (Jeffs and  
485 Lewis 2013, Andrade et al. 2016, Tougeron et al. 2017b). In addition, there was variation for  
486 plasticity in diapause induction among female genotypes, mostly in response to the parasitized  
487 morph but also to abiotic conditions, as determined by slopes of the reaction norms. This means  
488 that there is genetic polymorphism in diapause plasticity within populations, which may allow  
489 natural selection to act in the context of rapid environmental and climate changes (Sgrò et al.  
490 2016). Moreover, our results are of significance for the manipulation of insect diapause; e.g., in  
491 the context of mass rearing for the food industry, or for the biological control industry. More  
492 generally, a better appreciation of the processes governing phenology is needed to predict the

493 consequences of such phenology changes on species interactions and synchrony across multiple  
494 trophic levels, community functioning and ecosystem services.

495

#### 496 **Authors' Contributions**

497 KT performed the diapause experiments, analyzed the data and wrote the manuscript. KT  
498 and DR performed the metabolomic experiments and analyzed the metabolomic data. All co-  
499 authors substantially contributed at designing protocols and revising the manuscript.

500

#### 501 **Acknowledgments**

502 We are grateful to G. Le Trionnaire at INRA Le Rheu for providing the aphid clones. We  
503 thank S. Llopis and J. Doyon for technical support and J. Jaquiéry for stimulating discussions.  
504 KT was funded by the Fyssen foundation, by the French Région Bretagne (ARED grant) and by  
505 the Canada Research Chair in Biological Control awarded to JB.

506

#### 507 **Data accessibility**

508 Metabolomics and diapause data have been made publicly available as a supplementary  
509 material attached to this publication.

510

#### 511 **References**

- 512 Agrawal, A. A. 2001. Phenotypic plasticity in the interactions and evolution of species. *Science*  
513 294:321–326.
- 514 Andrade, T. O., L. Krespi, V. Bonnardot, J. van Baaren, and Y. Outreman. 2016. Impact of change in  
515 winter strategy of one parasitoid species on the diversity and function of a guild of parasitoids.  
516 *Oecologia* 180:877–888.
- 517 Andrade, T. O., Y. Outreman, L. Krespi, M. Plantegenest, A. Vialatte, B. Gauffre, and J. Van Baaren.  
518 2015. Spatiotemporal variations in aphid-parasitoid relative abundance patterns and food webs  
519 in agricultural ecosystems. *Ecosphere* 6:1–14.
- 520 Archetti, M., T. F. Döring, S. B. Hagen, N. M. Hughes, S. R. Leather, D. W. Lee, S. Lev-Yadun, Y.  
521 Manetas, H. J. Ougham, P. G. Schaberg, and others. 2009. Unravelling the evolution of  
522 autumn colours: an interdisciplinary approach. *Trends in ecology & evolution* 24:166–173.
- 523 Arrese, E. L., and J. L. Soulages. 2010. Insect Fat Body: Energy, Metabolism, and Regulation. *Annual*  
524 *Review of Entomology* 55:207–225.
- 525 van Baaren, J., and J. Nénon. 1996. Host location and discrimination mediated through olfactory  
526 stimuli in two species of Encyrtidae. *Entomologia experimentalis et applicata* 81:61–69.
- 527 Bale, J. S. 2002. Insects and low temperatures: from molecular biology to distributions and abundance.  
528 *Philosophical Transactions of the Royal Society B: Biological Sciences* 357:849–862.
- 529 Bale, J. S., and S. A. L. Hayward. 2010. Insect overwintering in a changing climate. *Journal of*  
530 *Experimental Biology* 213:980–994.
- 531 Boivin, G., T. Hance, and J. Brodeur. 2012. Aphid parasitoids in biological control. *Canadian Journal*  
532 *of Plant Science* 92:1–12.
- 533 Bradshaw, W. E., and C. M. Holzapfel. 2001. Genetic shift in photoperiodic response correlated with  
534 global warming. *Proceedings of the National Academy of Sciences* 98:14509–14511.

- 535 Brodeur, J., and J. N. McNeil. 1989. Biotic and abiotic factors involved in diapause induction of the  
536 parasitoid, *Aphidius nigripes* (Hymenoptera: Aphidiidae). *Journal of Insect Physiology*  
537 35:969–974.
- 538 Brodeur, J., and J. N. McNeil. 1994. Seasonal Ecology of *Aphidius nigripes* (Hymenoptera:  
539 Aphidiidae), a parasitoid of *Macrosiphum euphorbiae* (Homoptera: Aphididae).  
540 *Environmental Entomology* 23:292–298.
- 541 Brough, C., and A. Dixon. 1990. Ultrastructural features of egg development in oviparae of the vetch  
542 aphid, *Megoura viciae* Buckton. *Tissue and Cell* 22:51–63.
- 543 Chippendale, G. M. 1977. Hormonal regulation of larval diapause. *Annual Review of Entomology*  
544 22:121–138.
- 545 Christiansen-Weniger, P., and J. Hardie. 1997. Development Of The Aphid Parasitoid, *Aphidius ervi*,  
546 In Asexual And Sexual Females Of The Pea Aphid, *Acyrtosiphon pisum*, And The  
547 Blackberry-Cereal Aphid, *Sitobion fragariae*. *Entomophaga* 42:165–172.
- 548 Christiansen-Weniger, P., and J. Hardie. 1999. Environmental and physiological factors for diapause  
549 induction and termination in the aphid parasitoid, *Aphidius ervi* (Hymenoptera: Aphidiidae).  
550 *Journal of Insect Physiology* 45:357–364.
- 551 Colinet, H., F. Muratori, and T. Hance. 2010. Cold-induced expression of diapause in *Praon volucre*:  
552 fitness cost and morpho-physiological characterization. *Physiological Entomology* 35:301–  
553 307.
- 554 Colinet, H., D. Renault, B. Charoy-Guével, and E. Com. 2012. Metabolic and Proteomic Profiling of  
555 Diapause in the Aphid Parasitoid *Praon volucre*. *PLoS ONE* 7:e32606.
- 556 Colinet, H., P. Vernon, and T. Hance. 2007. Does thermal-related plasticity in size and fat reserves  
557 influence supercooling abilities and cold-tolerance in *Aphidius colemani* (Hymenoptera:  
558 Aphidiinae) mummies? *Journal of Thermal Biology* 32:374–382.
- 559 Danks, H. V. 1987. *Insect Dormancy: An Ecological Perspective*. Biological Survey of Canada  
560 (Terrestrial Arthropods). Ottawa, ON, Canada.
- 561 Dedryver, C.-A., M. Hullé, J.-F. Le Gallic, M. C. Caillaud, and J.-C. Simon. 2001. Coexistence in  
562 space and time of sexual and asexual populations of the cereal aphid *Sitobion avenae*.  
563 *Oecologia* 128:379–388.
- 564 Denlinger, D. L. 2002. Regulation of diapause. *Annual Review of Entomology* 47:93–122.
- 565 Dillwith, J. W., P. A. Neese, and D. L. Brigham. 1993. Lipid biochemistry in aphids. Pages 389–434  
566 *Insect Lipids: chemistry, biochemistry, and biology*. Stanley D.W. & Nelson D.R. (eds.).  
567 University of Nebraska Press, USA.
- 568 Dixon, A. F. G. 1985. *Aphid Ecology An optimization approach*. Springer Netherlands, Dordrecht.
- 569 Ellers, J., E. Toby Kiers, C. R. Currie, B. R. McDonald, and B. Visser. 2012. Ecological interactions  
570 drive evolutionary loss of traits. *Ecology Letters* 15:1071–1082.
- 571 Ellers, J., and J. J. Van Alphen. 2002. A trade-off between diapause duration and fitness in female  
572 parasitoids. *Ecological Entomology* 27:279–284.
- 573 Fordyce, J. A. 2006. The evolutionary consequences of ecological interactions mediated through  
574 phenotypic plasticity. *Journal of Experimental Biology* 209:2377–2383.
- 575 Gariépy, V., G. Boivin, and J. Brodeur. 2015. Why two species of parasitoids showed promise in the  
576 laboratory but failed to control the soybean aphid under field conditions. *Biological Control*  
577 80:1–7.
- 578 Gerling, D., E. Erel, M. Guershon, and M. Inbar. 2009. Bionomics of *Encarsia scapeata* Rivnay  
579 (Hymenoptera: Aphelinidae), tritrophic relationships and host-induced diapause. *Biological*  
580 *Control* 49:201–206.
- 581 Godfray, H. C. J. 1994. *Parasitoids: behavioral and evolutionary ecology*. Princeton University Press,  
582 USA.
- 583 Greenway, A. R., D. C. Griffiths, C. Furk, and R. N. B. Prior. 1974. Composition of triglycerides from  
584 aphids of six different families and from different seasonal forms of *Aphis evonymi*. *Journal of*  
585 *Insect Physiology* 20:2423–2431.
- 586 Hahn, D. A., and D. L. Denlinger. 2011. Energetics of insect diapause. *Annual Review of Entomology*  
587 56:103–121.
- 588 Hardie, J. 1980. Juvenile hormone mimics the photoperiodic apterization of the alate gynopara of  
589 aphid, *Aphis fabae*. *Nature* 286:602–604.



- 590 Hayward, S. A. L., S. C. Pavlides, S. P. Tammariello, J. P. Rinehart, and D. L. Denlinger. 2005.  
591 Temporal expression patterns of diapause-associated genes in flesh fly pupae from the onset of  
592 diapause through post-diapause quiescence. *Journal of Insect Physiology* 51:631–640.
- 593 Hodkova, M., and I. Hodek. 2004. Photoperiod, diapause and cold-hardiness. *European Journal of*  
594 *Entomology* 101:445–458.
- 595 Höller, C. 1990. Overwintering and hymenopterous parasitism in autumn of the cereal aphid *Sitobion*  
596 *avenae* (F.) in northern FR Germany. *Journal of applied Entomology* 109:21–28.
- 597 Hufbauer, R. A., S. M. Bogdanowicz, and R. G. Harrison. 2004. The population genetics of a  
598 biological control introduction: mitochondrial DNA and microsatellite variation in native and  
599 introduced populations of *Aphidus ervi*, a parasitoid wasp. *Molecular Ecology* 13:337–348.
- 600 Hughes, L. 2012. Climate Change Impacts on Species Interactions: Assessing the Threat of Cascading  
601 Extinctions. Pages 337–359 *Saving a Million Species*. Hannah L. (ed.). Island Press/Center for  
602 Resource Economics, Washington, DC.
- 603 Hullé, M., E. Turpeau, and B. Chaubet. 2006. Encyclop’aphid, a key for aphids and their parasitoids.
- 604 Hunter, M. D., and J. N. McNeil. 1997. Host-plant quality influences diapause and voltinism in a  
605 polyphagous insect herbivore. *Ecology* 78:977–986.
- 606 Ipert, G., and I. Hodek. 1974. Induction alimentaire de la dormance imaginale chez *Semiadalia*  
607 *undecimnotata* Schn. (Coleop. Coccinellidae) pour aider à la conservation des coccinelles  
608 élevées au laboratoire avant une utilisation ultérieure. *Annales Zoologie Ecologie Animale* 6:  
609 41–51.
- 610 Jaquière, J., S. Stoeckel, C. Larose, P. Nouhaud, C. Rispe, L. Mieuze, J. Bonhomme, F. Mahéo, F.  
611 Legeai, J.-P. Gauthier, N. Prunier-Leterme, D. Tagu, and J.-C. Simon. 2014. Genetic Control  
612 of Contagious Asexuality in the Pea Aphid. *PLoS Genetics* 10:e1004838.
- 613 Jeffs, C. T., and O. T. Lewis. 2013. Effects of climate warming on host-parasitoid interactions: Effects  
614 of climate warming. *Ecological Entomology* 38:209–218.
- 615 Jervis, M. A., J. Ellers, and J. A. Harvey. 2008. Resource Acquisition, Allocation, and Utilization in  
616 Parasitoid Reproductive Strategies. *Annual Review of Entomology* 53:361–385.
- 617 Khodayari, S., S. Moharramipour, V. Larvor, K. Hidalgo, and D. Renault. 2013. Deciphering the  
618 Metabolic Changes Associated with Diapause Syndrome and Cold Acclimation in the Two-  
619 Spotted Spider Mite *Tetranychus urticae*. *PLoS ONE* 8:e54025.
- 620 Kroon, A., R. L. Veenendaal, J. Bruin, M. Egas, and M. W. Sabelis. 2008. “Sleeping with the  
621 enemy”—predator-induced diapause in a mite. *Naturwissenschaften* 95:1195–1198.
- 622 Lalonde, R. G. 2004. Some dynamical consequences of parasitoid diapause. *Oikos* 107:338–344.
- 623 Lamb, R., and P. Pointing. 1972. Sexual morph determination in the aphid, *Acyrtosiphon pisum*.  
624 *Journal of Insect Physiology* 18:2029–2042.
- 625 Langer, A., and T. Hance. 2000. Overwintering strategies and cold hardiness of two aphid parasitoid  
626 species (Hymenoptera: Braconidae: Aphidiinae). *Journal of Insect Physiology* 46:671–676.
- 627 Le Trionnaire, G., F. Francis, S. Jaubert-Possamai, J. Bonhomme, E. De Pauw, J.-P. Gauthier, E.  
628 Haubruge, F. Legeai, N. Prunier-Leterme, J.-C. Simon, S. Tanguy, and D. Tagu. 2009.  
629 Transcriptomic and proteomic analyses of seasonal photoperiodism in the pea aphid. *BMC*  
630 *Genomics* 10:456.
- 631 Le Trionnaire, G., J. Hardie, S. Jaubert-Possamai, J.-C. Simon, and D. Tagu. 2008. Shifting from  
632 clonal to sexual reproduction in aphids: physiological and developmental aspects. *Biology of*  
633 *the Cell* 100:441–451.
- 634 Leather, S. R. 1992. Aspects of Aphid Overwintering (Homoptera: Aphidinea: Aphididae).  
635 *Entomologia Generalis* 17:101–113.
- 636 Leather, S. R., K. F. Walters, and J. S. Bale. 1993. The ecology of insect overwintering. Cambridge  
637 University Press, USA.
- 638 Polgár, L. A., B. Darvas, and W. Völkl. 1995. Induction of dormancy in aphid parasitoids:  
639 implications for enhancing their field effectiveness. *Agriculture, Ecosystems & Environment*  
640 52:19–23.
- 641 Polgár, L. A., and J. Hardie. 2000. Diapause induction in aphid parasitoids. *Entomologia*  
642 *Experimentalis et Applicata* 97:21–27.
- 643 Polgár, L. A., M. Mackauer, and W. Völkl. 1991. Diapause induction in two species of aphid  
644 parasitoids: the influence of aphid morph. *Journal of insect physiology* 37:699–702.

- 645 R Core Team. 2017. R: A language and environment for statistical computing. R Foundation for  
646 Statistical Computing, Vienna, Austria.
- 647 Sayah, F. 2008. Changes in the lipid and fatty acid composition of hemolymph and ovaries during the  
648 reproductive cycle of *Labidura riparia*. *Entomological Science* 11:55–63.
- 649 Sgrò, C. M., J. S. Terblanche, and A. A. Hoffmann. 2016. What Can Plasticity Contribute to Insect  
650 Responses to Climate Change? *Annual Review of Entomology* 61:433–451.
- 651 Sinclair, B. J., and K. E. Marshall. 2018. The many roles of fats in overwintering insects. *The Journal*  
652 *of Experimental Biology* 221:jeb161836.
- 653 Ślusarczyk, M. 1995. Predator-Induced Diapause in *Daphnia*. *Ecology* 76:1008–1013.
- 654 Ślusarczyk, M. 1999. Predator-induced diapause in *Daphnia magna* may require two chemical cues.  
655 *Oecologia* 119:159–165.
- 656 Sömme, L. 1969. Mannitol and glycerol in overwintering aphid eggs. *Norsk Entomologisk Tidsskrift*  
657 16:107–111.
- 658 Storey, K. B., and J. M. Storey. 1991. Biochemistry of cryoprotectants. *Insects at low temperature*.  
659 Pages 64-93. Lee R. (ed.). Springer, The Netherlands.
- 660 Tauber, M. J., C. A. Tauber, and S. Masaki. 1986. Seasonal adaptations of insects. Oxford university  
661 press, New-York, USA.
- 662 Terblanche, J. ., C. . Klok, and S. . Chown. 2004. Metabolic rate variation in *Glossina pallidipes*  
663 (Diptera: Glossinidae): gender, ageing and repeatability. *Journal of Insect Physiology* 50:419–  
664 428.
- 665 Teulier, L., J.-M. Weber, J. Crevier, and C.-A. Darveau. 2016. Proline as a fuel for insect flight:  
666 enhancing carbohydrate oxidation in hymenopterans. *Proceedings of the Royal Society B:*  
667 *Biological Sciences* 283:20160333.
- 668 Thompson, J. N. 1988. Variation in interspecific interactions. *Annual review of ecology and*  
669 *systematics* 19:65–87.
- 670 Tougeron, K., G. Hraoui, C. Le Lann, J. Van Baaren, and J. Brodeur. 2017a. Intraspecific maternal  
671 competition induces summer diapause in insect parasitoids. *Insect Science* 25:1080–1088.
- 672 Tougeron, K., C. Le Lann, J. Brodeur, and J. van Baaren. 2017b. Are aphid parasitoids from mild  
673 winter climates losing their winter diapause? *Oecologia* 183:619–629.
- 674 Tougeron, K., J. Van Baaren, S. Llopis, A. Ridet, J. Doyon, J. Brodeur, and C. Le Lann. 2018.  
675 Disentangling plasticity from local adaptation in diapause expression in parasitoid wasps from  
676 contrasting thermal environments: a reciprocal translocation experiment. *Biological Journal of*  
677 *the Linnean Society* 124:756–764.
- 678 Tylianakis, J. M., R. K. Didham, J. Bascompte, and D. A. Wardle. 2008. Global change and species  
679 interactions in terrestrial ecosystems. *Ecology Letters* 11:1351–1363.
- 680 Vieira, R., J. M. Míguez, and M. Aldegunde. 2005. GABA modulates day–night variation in  
681 melatonin levels in the cerebral ganglia of the damselfly *Ischnura graellsii* and the  
682 grasshopper *Oedipoda caerulea*. *Neuroscience letters* 376:111–115.
- 683 Walther, G.-R. 2010. Community and ecosystem responses to recent climate change. *Philosophical*  
684 *Transactions of the Royal Society B: Biological Sciences* 365:2019–2024.

685
